# Supplementary material for: Assessment of Common Cyanotoxins in Cyanobacteria of Biological Loess Crusts
Source: MDPI journal article supplement (doi:10.3390/toxins14030215), 2022-03-16

Supplementary Material S2

- Extracted ion chromatogram and fragmentation spectrum of MC-LR (m/z 995) in PCC7820
- Extracted ion chromatogram and fragmentation spectrum of CYN (m/z 416) (CRM)
- Chromatograms of STX and GTX2/3 (CRM)
- MRM Chromatogram of BMAA, DAB, AEG, and D3BMAA

Figure S1. Extracted ion chromatogram (a) and fragmentation spectrum (b) of MC-LR in PCC7820

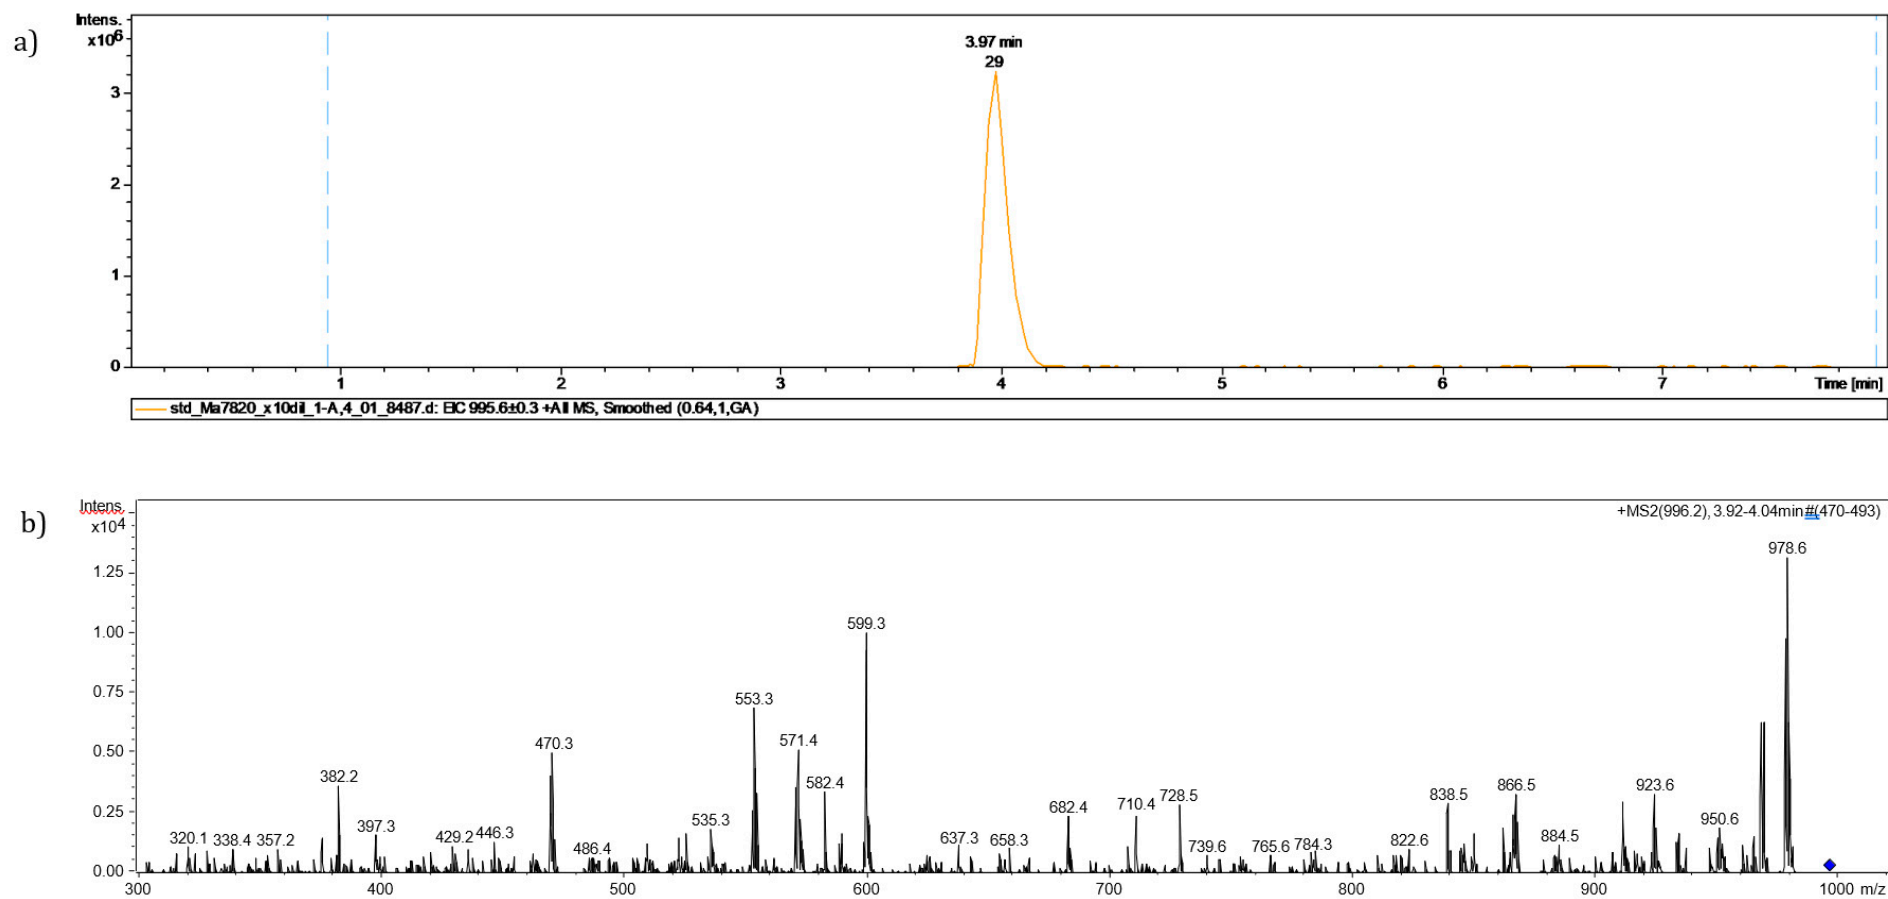

Figure S2. Extracted ion chromatogram (a) and fragmentation spectrum (b) of Cyindrospormopsin (CRM) reference

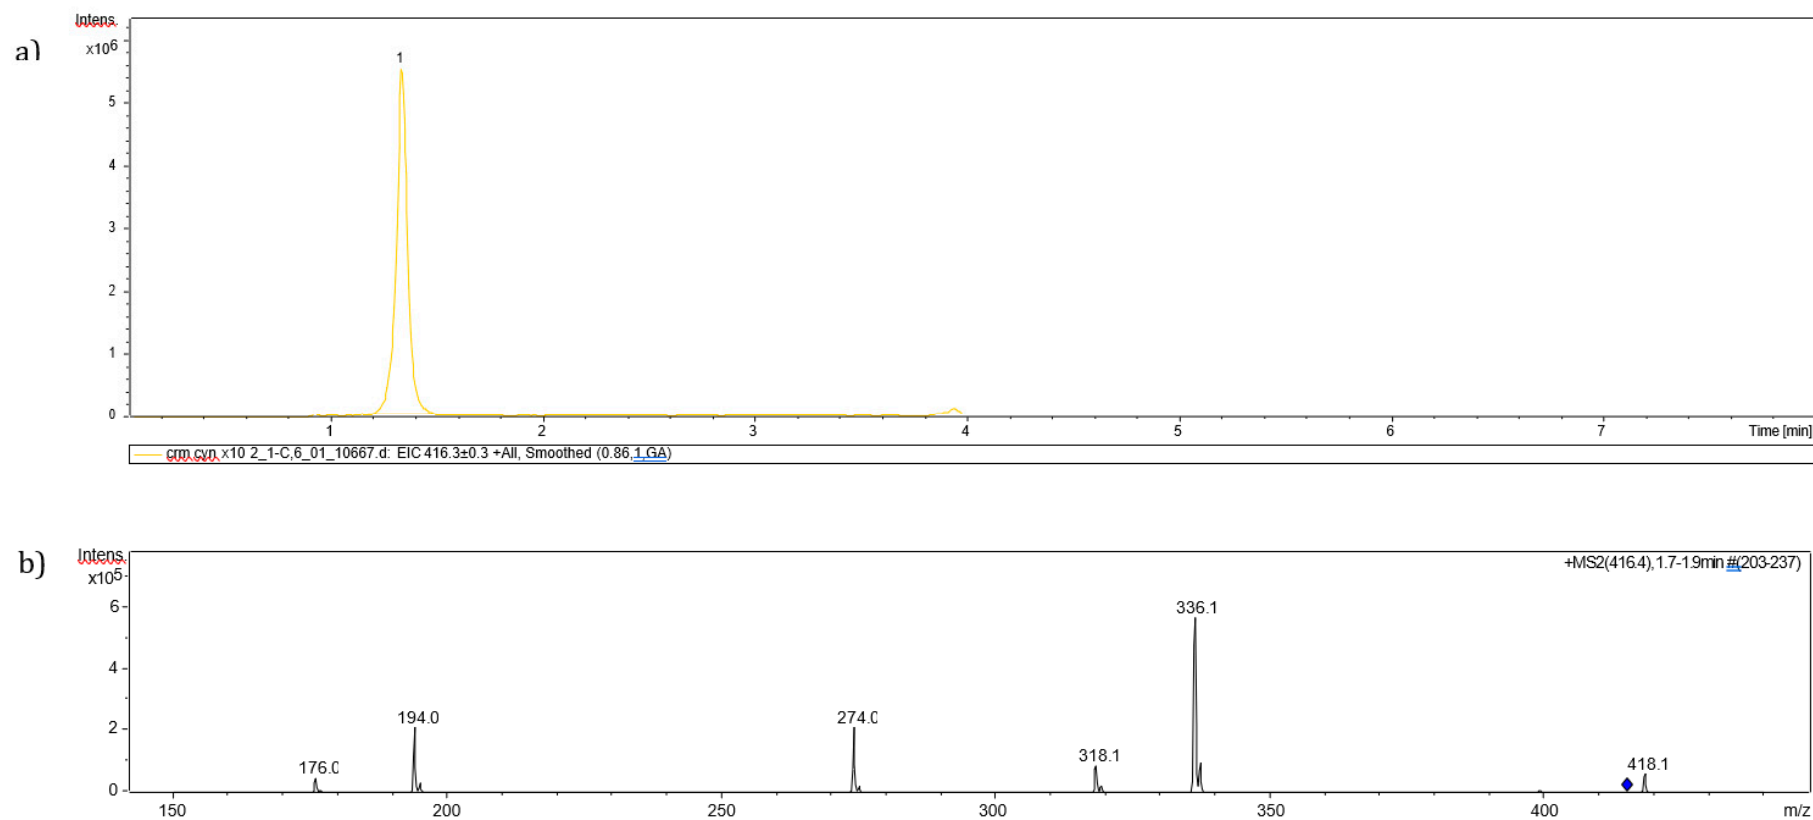

Figure S3. Chromatogram of STX (CRM)

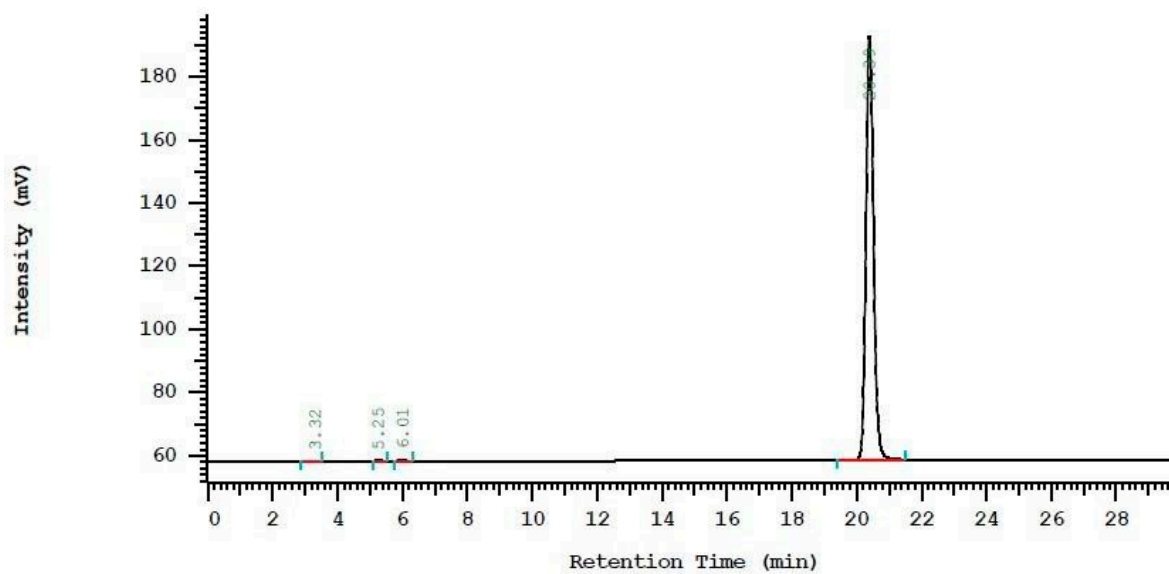

Figure S4. Chromatogram of GTX2/3 (CRM)

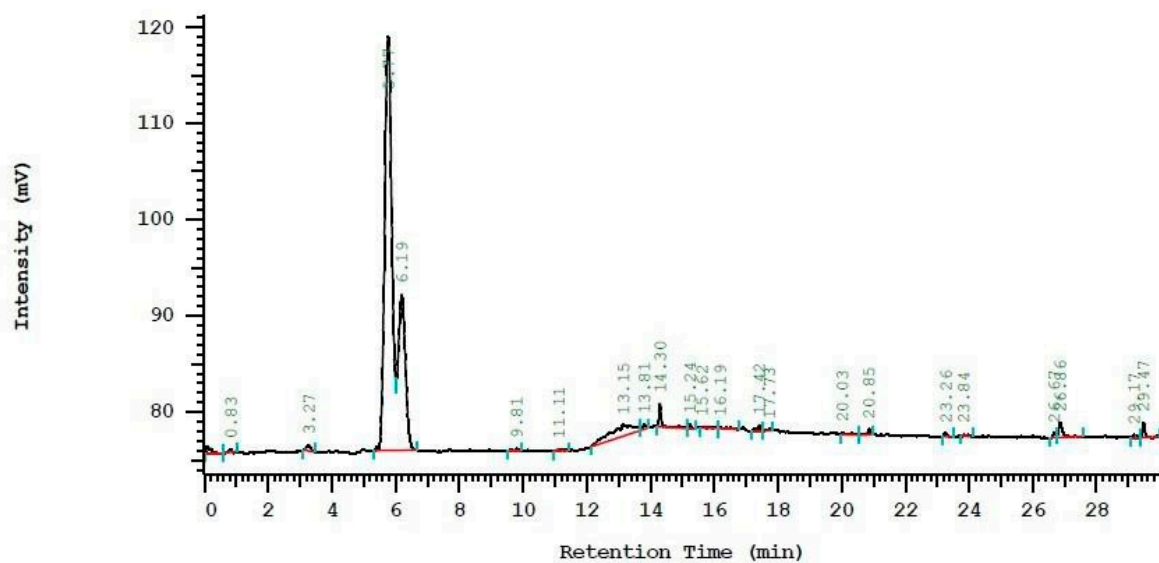

Figure S5. MRM chromatograms of BMAA, DAB, AEG, and D3BMAA

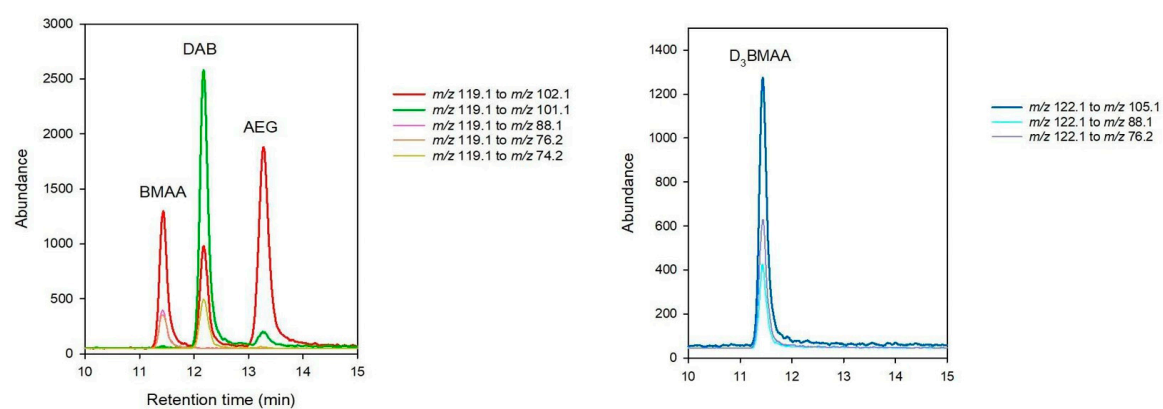

Supplement: s1 [file s1]
