# Supplementary material for: Assessment of Common Cyanotoxins in Cyanobacteria of Biological Loess Crusts
Source: MDPI journal article supplement (doi:10.3390/toxins14030215), 2022-03-16
Supplement: s1 [file s1]

Supplementary Material S1. Mixed-strain cultures of cyanobacteria isolated from BLC.

Table S1. Mixed-strain cultures of cyanobacteria isolated from BLC samples from China. Genera in the table are the predominant genera in the mixed culture (assessment based on visual inspection); genera in bold denote the strains used in the PCR analyses. CTs: cyanotoxins analysed in each culture.

| China       |                                |                      |                      |                                      |                                               |                                                                       |                                                |                                      |                                                                |                           |
|-------------|--------------------------------|----------------------|----------------------|--------------------------------------|-----------------------------------------------|-----------------------------------------------------------------------|------------------------------------------------|--------------------------------------|----------------------------------------------------------------|---------------------------|
| SAMPLE NAME | GP1                            | GP2                  | GP3                  | GP4                                  | GP5                                           | GP6                                                                   | GP7                                            | GP8                                  | GP9                                                            | GP10                      |
| GENERA      | <i>Nostoc</i><br><i>Nostoc</i> | <b><i>Nostoc</i></b> | <b><i>Nostoc</i></b> | <i>Nostoc</i><br><i>Leptolyngbya</i> | <i>Leptolyngbya</i><br><i>Chlorogloeopsis</i> | <i>Leptolyngbya</i><br><b><i>Nostoc</i></b><br><i>Chlorogloeopsis</i> | <b><i>Leptolyngbya</i></b><br><i>Calothrix</i> | <i>Leptolyngbya</i><br><i>Nostoc</i> | <i>Leptolyngbya</i><br><i>Tolypothrix</i><br><i>Trichormus</i> | <b>cf. <i>Mojavia</i></b> |
| CTs         | MCs                            | MCs                  | MCs                  | MCs                                  | MCs                                           | MCs                                                                   | MCs                                            | MCs                                  | MCs                                                            | MCs                       |

| SAMPLE NAME | GP11                                        | GP12                                 | GP13          | GP14          | GP15                                 | GP16                                 | GP17                                          | GP18                | GP19                                                 | GP20                          |
|-------------|---------------------------------------------|--------------------------------------|---------------|---------------|--------------------------------------|--------------------------------------|-----------------------------------------------|---------------------|------------------------------------------------------|-------------------------------|
| GENERA      | <b><i>Nostoc</i></b><br><i>Leptolyngbya</i> | <i>Leptolyngbya</i><br><i>Nostoc</i> | <i>Nostoc</i> | <i>Nostoc</i> | <i>Nostoc</i><br><i>Leptolyngbya</i> | <i>Leptolyngbya</i><br><i>Nostoc</i> | <i>Leptolyngbya</i><br><i>Chlorogloeopsis</i> | <i>Leptolyngbya</i> | <i>Leptolyngbya</i><br><b><i>Chlorogloeopsis</i></b> | <b><i>Chlorogloeopsis</i></b> |
| CTs         | MCs                                         | MCs                                  | MCs           | MCs           | MCs                                  | MCs                                  | MCs                                           | MCs                 | MCs                                                  | MCs                           |

| SAMPLE NAME | LR1                 | LR2                                    | LR3  | LR4                                    | LR5                              | LR6           | LR7                              | LR8                | LR9                                  | LR10                                          |
|-------------|---------------------|----------------------------------------|------|----------------------------------------|----------------------------------|---------------|----------------------------------|--------------------|--------------------------------------|-----------------------------------------------|
| GENERA      | <i>Leptolyngbya</i> | <i>Leptolyngbya</i><br><i>Symploca</i> | n.d. | <i>Symploca</i><br><i>Leptolyngbya</i> | <i>Nostoc</i><br><i>Symploca</i> | <i>Nostoc</i> | <i>Symploca</i><br><i>Nostoc</i> | <i>Desmonostoc</i> | <i>Leptolyngbya</i><br><i>Nostoc</i> | <i>Chlorogloeopsis</i><br><i>Leptolyngbya</i> |
| CTs         | MCs                 | MCs                                    | MCs  | MCs                                    | MCs                              | MCs           | MCs                              | MCs                | MCs                                  | MCs                                           |

\*table continues

| SAMPLE NAME | LR11                                           | LR12                           | LR13                                               | LR14                              | MC1                | MC2                        | MC3                        | MC4                            | MC5           | MC6                                            |
|-------------|------------------------------------------------|--------------------------------|----------------------------------------------------|-----------------------------------|--------------------|----------------------------|----------------------------|--------------------------------|---------------|------------------------------------------------|
| GENERA      | <i>Nostoc<br/>Leptolyngbya<br/>Chroococcus</i> | <i>Leptolyngbya<br/>Nostoc</i> | <i>Nostoc<br/>Leptolyngbya<br/>Chlorogloeopsis</i> | <i>Nostoc<br/>Chlorogloeopsis</i> | <i>cf. Mojavia</i> | <i>Nostoc<br/>Symploca</i> | <b><i>Leptolyngbya</i></b> | <i>Leptolyngbya<br/>Nostoc</i> | <i>Nostoc</i> | <i>Nostoc<br/>Leptolyngbya<br/>Tolypothrix</i> |
| CTs         | MCs                                            | MCs                            | MCs                                                | MCs                               | MCs<br>CYN         | MCs<br>CYN                 | MCs<br>CYN                 | MCs<br>CYN                     | MCs<br>CYN    | MCs<br>CYN                                     |

| SAMPLE NAME | MC7                                            | MC8                                            | MC9                                            | MC10                                           | MC11                                                  | MC12                          | LP1                            | LP2                  | LP3                          | LP4               |
|-------------|------------------------------------------------|------------------------------------------------|------------------------------------------------|------------------------------------------------|-------------------------------------------------------|-------------------------------|--------------------------------|----------------------|------------------------------|-------------------|
| GENERA      | <i>Nostoc<br/>Leptolyngbya<br/>Tolypothrix</i> | <i>Nostoc<br/>Leptolyngbya<br/>Tolypothrix</i> | <i>Nostoc<br/>Leptolyngbya<br/>Tolypothrix</i> | <i>Nostoc<br/>Leptolyngbya<br/>Tolypothrix</i> | <b><i>Nostoc<br/>Leptolyngbya<br/>Tolypothrix</i></b> | <i>Nostoc<br/>Tolypothrix</i> | <i>Leptolyngbya<br/>Nostoc</i> | <b><i>Nostoc</i></b> | <i>Nostoc<br/>Trichormus</i> | <i>Trichormus</i> |
| CTs         | MCs<br>CYN                                     | MCs<br>CYN                                     | MCs<br>CYN                                     | MCs<br>CYN                                     | MCs<br>CYN                                            | MCs<br>CYN                    | MCs                            | MCs                  | MCs                          | MCs               |

| SAMPLE NAME | LP5                | LP6                                            | LP7                                            | LP8                  | XFU                                       | XFU1                                        | XFU3                      | ZJ1                                   | ZJ2                 | ZJ3              |
|-------------|--------------------|------------------------------------------------|------------------------------------------------|----------------------|-------------------------------------------|---------------------------------------------|---------------------------|---------------------------------------|---------------------|------------------|
| GENERA      | <i>cf. Mojavia</i> | <i>Leptolyngbya<br/>Nostoc<br/>cf. Mohavia</i> | <i>Leptolyngbya<br/>Nostoc<br/>cf. Mohavia</i> | <b><i>Nostoc</i></b> | <i>Nostoc<br/>Scytonema<br/>Calothrix</i> | <i>Leptolyngbya<br/>Symploca<br/>Nostoc</i> | <b><i>Tolypothrix</i></b> | <b><i>Leptolyngbya<br/>Nostoc</i></b> | <i>Leptolyngbya</i> | <i>Scytonema</i> |
| CTs         | MCs                | MCs                                            | MCs                                            | MCs                  | MCs                                       | MCs                                         | MCs                       | MCs<br>CYN                            | MCs<br>CYN          | MCs<br>CYN       |

| SAMPLE NAME | ZJ4                                                      | ZJ5                 | ZJ6           | ZJ7           | ZJ8             | ZJ9           |
|-------------|----------------------------------------------------------|---------------------|---------------|---------------|-----------------|---------------|
| GENERA      | <i>Nostoc</i><br><i>Leptolyngbya</i><br><i>Scytonema</i> | <i>Leptolyngbya</i> | <i>Nostoc</i> | <i>Nostoc</i> | <i>Symploca</i> | <i>Nostoc</i> |
| CTs         | MCs<br>CYN                                               | MCs<br>CYN          | MCs<br>CYN    | MCs<br>CYN    | MCs<br>CYN      | MCs<br>CYN    |

Table S1.2. Mixed-strain cultures of cyanobacteria isolated from BLC samples from Iran. Genera in the table are the predominant genera in the mixed culture (assessment based on visual inspection); genera in bold denote the strains used in the PCR analyses. CTs: cyanotoxins analysed in each culture.

| Iran        |                    |                                     |               |               |                                    |                                |                                      |                                         |               |                        |                      |
|-------------|--------------------|-------------------------------------|---------------|---------------|------------------------------------|--------------------------------|--------------------------------------|-----------------------------------------|---------------|------------------------|----------------------|
| SAMPLE NAME | IRN1A              | IRN1B                               | IRN2          | IRN3          | IRN4                               | IRN5A                          | IRN5B                                | IRN5C                                   | IRN5D         | IRN5E                  | IRN5F                |
| GENERA      | <i>Tolypothrix</i> | <i>Nostoc</i><br><i>Leptolyngba</i> | <i>Nostoc</i> | <i>Nostoc</i> | <i>Nostoc</i><br><i>Trichormus</i> | <i>Nostoc</i><br><i>Nostoc</i> | <i>Leptolyngbya</i><br><i>Nostoc</i> | <i>Leptolyngbya</i><br><i>Scytonema</i> | <i>Nostoc</i> | <i>Chlorogloeopsis</i> | <i>Chlorogloeop.</i> |
| CTs         | MCs<br>CYN         | MCs<br>CYN                          | MCs<br>CYN    | MCs<br>CYN    | MCs<br>CYN                         | MCs<br>CYN                     | MCs<br>CYN                           | MCs<br>CYN                              | MCs<br>CYN    | MCs<br>CYN             | MCs<br>CYN           |

| SAMPLE NAME | IRN5G              | IRN5H         | IRN5I                               | IRN5J                                                               | IRN5K              | IRN6                                                            | IRN7                                    | IRN8          | IRN9A                  | IRN9B         |
|-------------|--------------------|---------------|-------------------------------------|---------------------------------------------------------------------|--------------------|-----------------------------------------------------------------|-----------------------------------------|---------------|------------------------|---------------|
| GENERA      | <i>Desmonostoc</i> | <i>Nostoc</i> | <i>Desmonostoc</i><br><i>Nostoc</i> | <i>Leptolyngbya</i><br><i>Tolypothrix</i><br><i>Chlorogloeopsis</i> | <i>Desmonostoc</i> | <i>Leptolyngbya</i><br><i>Nostoc</i><br><i>Pseudophormidium</i> | <i>Leptolyngbya</i><br><i>Scytonema</i> | <i>Nostoc</i> | <i>Chlorogloeopsis</i> | <i>Nostoc</i> |
| CTs         | MCs<br>CYN         | MCs<br>CYN    | MCs<br>CYN                          | MCs<br>CYN                                                          | MCs<br>CYN         | MCs                                                             | MCs                                     | MCs           | MCs                    |               |

Table S1.3. Mixed-strain cultures of cyanobacteria isolated from BLC samples from Serbia. Genera in the table are the predominant genera in the mixed culture (assessment based on visual inspection); genera in bold denote the strains used in the PCR analyses. CTs: cyanotoxins analysed in each culture.

| Serbia      |                                      |                                      |                         |                                       |                                         |                                                         |                                   |                                       |                                                |
|-------------|--------------------------------------|--------------------------------------|-------------------------|---------------------------------------|-----------------------------------------|---------------------------------------------------------|-----------------------------------|---------------------------------------|------------------------------------------------|
| SAMPLE NAME | SSS1                                 | SSS2                                 | SSS4                    | SSS5                                  | R1                                      | R3                                                      | R4                                | R5                                    | R6                                             |
| GENERA      | <i>Leptolyngbya</i><br><i>Nostoc</i> | <i>Nostoc</i><br><i>Leptolyngbya</i> | <i>Nostoc</i>           | <i>Nostoc</i><br><i>Symplocastrum</i> | <i>Nostoc</i><br><i>Chlorogloeopsis</i> | <i>Nostoc</i><br><i>Chlorogloeopsis</i>                 | <i>Scytonema</i><br><i>Nostoc</i> | <i>Nostoc</i><br><i>Chlorogloeop.</i> | <i>Scytonematopsis</i><br><i>Symplocastrum</i> |
| CTs         | MCs                                  | MCs                                  | MCs                     | MCs                                   | MCs                                     | MCs                                                     | MCs                               | MCs                                   | MCs                                            |
| SAMPLE NAME | M1                                   | M2                                   | LES1                    | LES2                                  | LES3                                    | LES4                                                    | LES5                              | LES6                                  | LES7                                           |
| GENERA      | <i>Leptolyngbya</i><br><i>Nostoc</i> | <i>Nostoc</i>                        | <i>Chroococidiopsis</i> | <i>Nostoc</i>                         | <i>Scytonema</i><br><i>Nostoc</i>       | <i>Scytonema</i><br><i>Chroococcus</i><br><i>Nostoc</i> | <i>Nostoc</i><br><i>Scytonema</i> | <i>Scytonema</i><br><i>Nostoc</i>     | <i>Leptolyngbya</i><br><i>Nostoc</i>           |
| CTs         | MCs                                  | MCs                                  | MCs<br>STX<br>GTX2/3    | MCs<br>STX<br>GTX2/3                  | MCs<br>STX<br>GTX2/3                    | MCs<br>STX<br>GTX2/3                                    | MCs<br>STX<br>GTX2/3              | MCs<br>STX<br>GTX2/3                  | MCs<br>STX<br>GTX2/3                           |
| SAMPLE NAME | LES8                                 | V                                    | SL                      | R2                                    | LES5-1                                  | TLP VIL                                                 | SSSu                              | RUMA                                  | IRIG                                           |

| GENERA | <i>Nostoc<br/>Leptolyngbya</i> | <i>Leptolyngbya<br/>Oculatella</i> | <i>Nostoc<br/>Pseudanabaen<br/>a</i> | <i>Nostoc<br/>Scytonema</i> | <i>Scytonema</i> | <b><i>Chroococcus</i></b><br><i>Nostoc</i> | <b><i>Leptolyngbya</i></b><br><i>Nostoc</i> | <b><i>Chlorogloeopsis</i></b><br><i>Leptolyngbya</i> | <i>Leptolyngbya<br/>Nostoc</i> |
|--------|--------------------------------|------------------------------------|--------------------------------------|-----------------------------|------------------|--------------------------------------------|---------------------------------------------|------------------------------------------------------|--------------------------------|
| CTs    | MCs<br>STX<br>GTX2/3           | MCs                                | MCs                                  | STX<br>GTX2/3               | STX<br>GTX2/3    |                                            |                                             |                                                      |                                |
